# Supplementary material for: Chronic HIV infection induces transcriptional and functional reprogramming of innate immune cells
Source: JCI journal article supplement (doi:10.1172/jci.insight.145928), 2021-02-28
Supplement: sd1 [file 1]

**Supplemental table S1** Baseline characteristics validation cohort

|                                | <b>HIV (n=28)</b> | <b>HC (n=14)</b> |
|--------------------------------|-------------------|------------------|
| <b>Male sex, no. (%)</b>       | 28 (100)          | 14 (100)         |
| <b>Age, median (IQR) years</b> | 56.3 (9.6)        | 64.3 (12.5)      |
| <b>cART regimen, no. (%)</b>   |                   |                  |
| <b>NNRTI</b>                   | 6 (21.4)          | -                |
| <b>PI</b>                      | 2 (7.1)           | -                |
| <b>Integrase inhibitor</b>     | 20 (71.4)         | -                |
| <b>DTG</b>                     | 16 (57.1)         | -                |
| <b>ELV</b>                     | 1 (3.6)           | -                |
| <b>RAL</b>                     | 3 (10.7)          | -                |

**Supplementary table S2** Stimulations scheme for the ex vivo cytokine production assays.

| <b>Stimulus</b>                          | <b>Final Concentration</b>                      | <b>Strain/Manufacture</b>                |
|------------------------------------------|-------------------------------------------------|------------------------------------------|
| <b>Stimulation of PBMCs for 24 hours</b> |                                                 |                                          |
| <b>LPS</b>                               | 1 and 100 ng/mL                                 | E.coli/Sigma                             |
| <b>Pam3Cys</b>                           | 10 µg/mL                                        | EMC microcollections                     |
| <b>RPMI (+ serum</b>                     | 10% human serum                                 | Life Technologies                        |
| <b>Poly I:C</b>                          | 100 µg/mL                                       | Sas Invivogen                            |
| <b>Imiquimod (TLR7 ligand)</b>           | 5 ug/mL                                         | Invivogen                                |
| <b>Influenza + serum</b>                 | 1.25 x 10 <sup>6</sup> PFU/mL + 10% human serum | H1N1 (in house)                          |
| <b>Mycobacterium tuberculosis</b>        | 1 µg/mL                                         | H37Rv (in house)                         |
| <b>E.Coli</b>                            | 1 x 10 <sup>6</sup> /mL                         | ATCC 35218 (in house)                    |
| <b>Candida albicans conidia</b>          | 1 x 10 <sup>6</sup> /mL                         | UC820 (in house)                         |
| <b>Candida albicans hyphae</b>           | 1 x 10 <sup>6</sup> /mL                         | UC820 (in house)                         |
| <b>Staphylococcus aureus</b>             | 1 x 10 <sup>6</sup> /mL                         | ATCC 29213 (in house)                    |
| <b>Cryptococcus gattii + serum</b>       | 1 x 10 <sup>7</sup> /mL + 10% human serum       | A1M-R265, AFLP type 6 (clinical isolate) |
| <b>Streptococcus pneumonia</b>           | 1 x 10 <sup>7</sup> /mL                         | TIGR4                                    |
| <b>Stimulation of PBMCs for 7 days*</b>  |                                                 |                                          |
| <b>RPMI + serum</b>                      | 10% human serum                                 | Life technologies                        |
| <b>Staphylococcus aureus</b>             | 1 x 10 <sup>6</sup> /mL                         |                                          |
| <b>Cryptococcus gattii</b>               | 1 x 10 <sup>7</sup> /mL                         | A1M-R265, AFLP type 6 (clinical isolate) |
| <b>Candida albicans conidia</b>          | 1 x 10 <sup>6</sup> /mL                         | UC820 (in house)                         |
| <b>Candida albicans hyphae</b>           | 1 x 10 <sup>6</sup> /mL                         | UC820 (in house)                         |
| <b>Streptococcus pneumonia</b>           | 1 x 10 <sup>6</sup> /mL                         | TIGR4                                    |
| <b>Mycobacterium tuberculosis</b>        | 1 µg/mL                                         | H37Rv (in house)                         |
| <b>Imiquimod (TLR7 ligand)</b>           | 2.5 ug/mL                                       | Invivogen                                |

PBMCs: peripheral blood mononuclear cells; LPS: lipopolysaccharide; TLR: Toll-like receptor.

\*All 7-day PBMC stimulation experiments were supplemented with 10% human pool serum.

**Supplemental table S3** Antibodies for immunophenotyping

| Fluorochrome       | FITC | PE     | ECD  | PE-Cy5.5 | PC7  | APC  | APC-AF700 | APC-AF750 | PB  | KO   |
|--------------------|------|--------|------|----------|------|------|-----------|-----------|-----|------|
| <b>mAb</b>         | CD16 | HLA-DR | CD14 | CD4      | CD25 | CD56 | CD8       | CD19      | CD3 | CD45 |
| <b>Distributor</b> | BC   | BC     | BC   | BC       | BD   | BC   | BC        | BC        | BC  | BC   |

10-color flow cytometry panel. Samples were analyzed by a 3-laser Navios (BC).

mAb: monoclonal antibody; BC: Beckman Coulter, CA, USA, BD: BD biosciences, CA, USA

**Supplemental table S4** Primers and probes

| Gene             | Fw/Rv/Pr | Sequence (5'>3')        |
|------------------|----------|-------------------------|
| <b>NLRP3</b>     | forward  | GATCTTCGCTGCGATCAACA    |
|                  | reverse  | GGGATTCGAAACACGTGCATTA  |
| <b>18S</b>       | forward  | GATGGGCGGCGGAAAATAG     |
|                  | reverse  | GCGTGGATTCTGCATAATGGT   |
| <b>B2M</b>       | forward  | ATGAGTATGCCTGCCGTGTG    |
|                  | reverse  | CCAAATGCGGCATCTTCAAAC   |
| <b>RPL37A</b>    | forward  | ATTGAAATCAGCCAGCACG     |
|                  | reverse  | AGGAACCACAGTGCCAGAT     |
| <b>TNFA</b>      | forward  | CCTGCTGCACTTTGGAGTGA    |
|                  | reverse  | GAGGGTTTGCTACAACATGGG   |
| <b>IL6</b>       | forward  | GGCACTGGCAGAAAACAACC    |
|                  | reverse  | GCAAGTCTCCTCATTGAATCC   |
| <b>IL1b</b>      | forward  | ACAGATGAAGTGCTCCTCCAG   |
|                  | reverse  | CATGGCCACAACAACACTGACG  |
| <b>HIV-1 DNA</b> | forward  | GCCTCAATAAAGCTTGCC      |
|                  | reverse  | GGCGCCACTGCTAGAGATTTT   |
|                  | probe    | AAGTRGTGTGTGCC          |
| <b>RPP30</b>     | forward  | AGATTTGGACCTGCGAGCG     |
|                  | reverse  | GAGCGGCTGTCTCCACAAGT    |
|                  | probe    | TTCTGACCTGAAGGCTCTGCGCG |

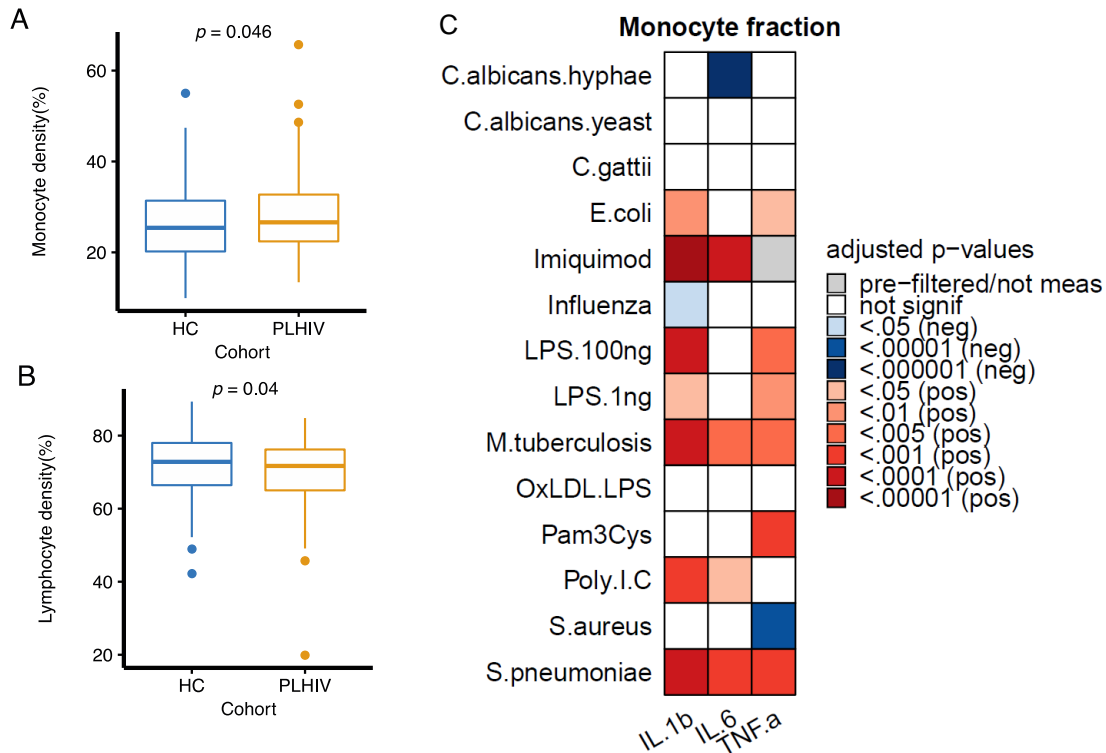

**Supplemental figure S1:** A-B Composition of PBMCs determined by haematology analyzer. A: depicts percentage (%) of monocytes in PBMC. B: lymphocyte percentage of total PBMCs. C: Adjusted P-value are depicted from a corrected model including age, sex, seasonality and monocyte fraction (of PMBCs) as covariates. Red depicts significantly higher in PLHIV, blue depicts lower in PLHIV compared to controls. All p-values are FDR corrected.

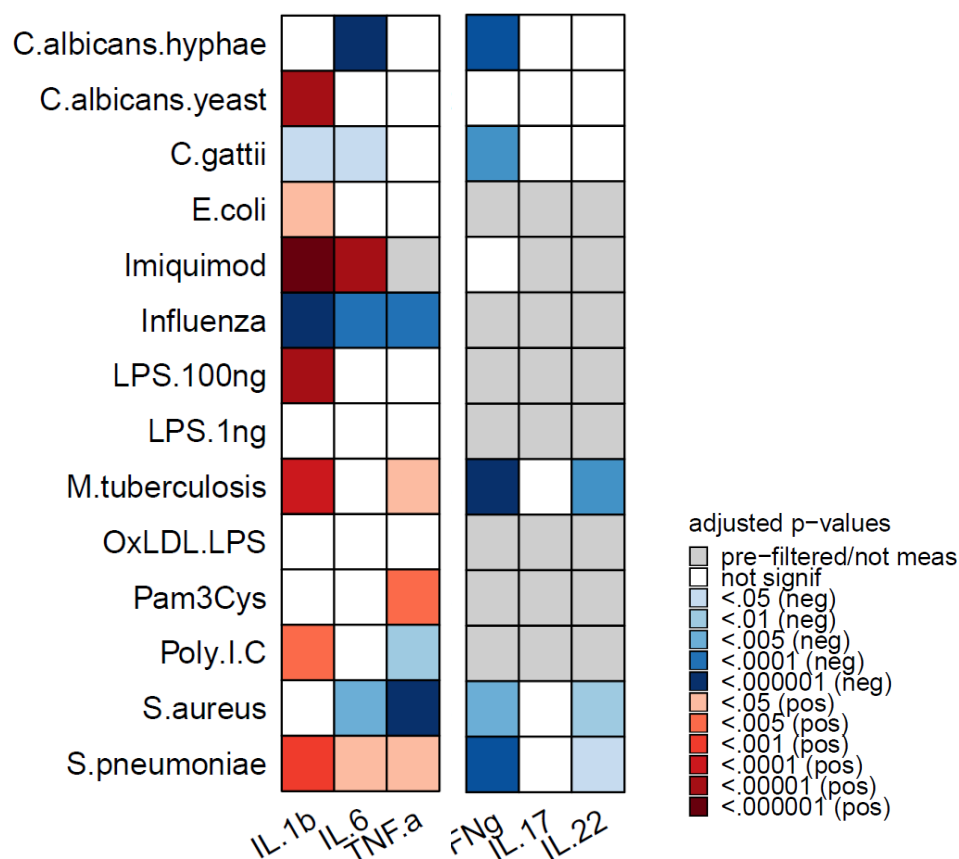

**Supplemental Figure S2; Crude values 24h and 7 days cytokine production.** Circulating factors in PLHIV and uninfected controls. Crude model is linear regression after inverse rank-based transformation. Corrected model included age, sex, and seasonality as covariates. Red depicts the marker is significantly increased in PLHIV, blue depicts the marker is decreased in PLHIV compared to controls. All p-values are FDR corrected.

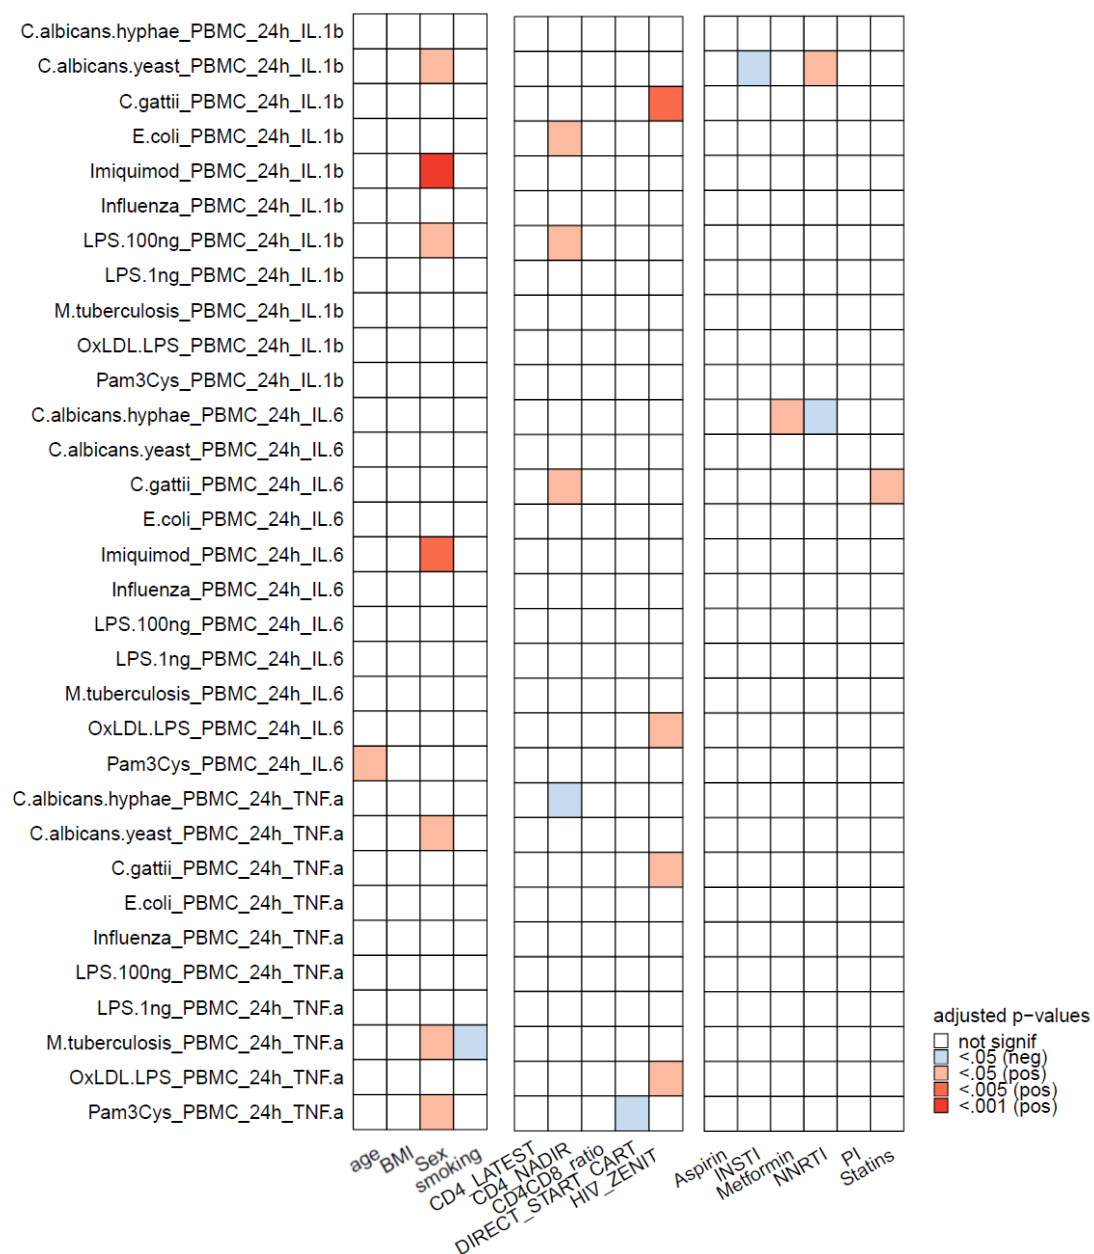

**Supplemental figure S3:** Adjusted P-value are depicted from a corrected linear regression model including age, sex, seasonality as covariates. Red depicts a significant positive correlation, blue depicts negative correlation. All p-values are FDR corrected.

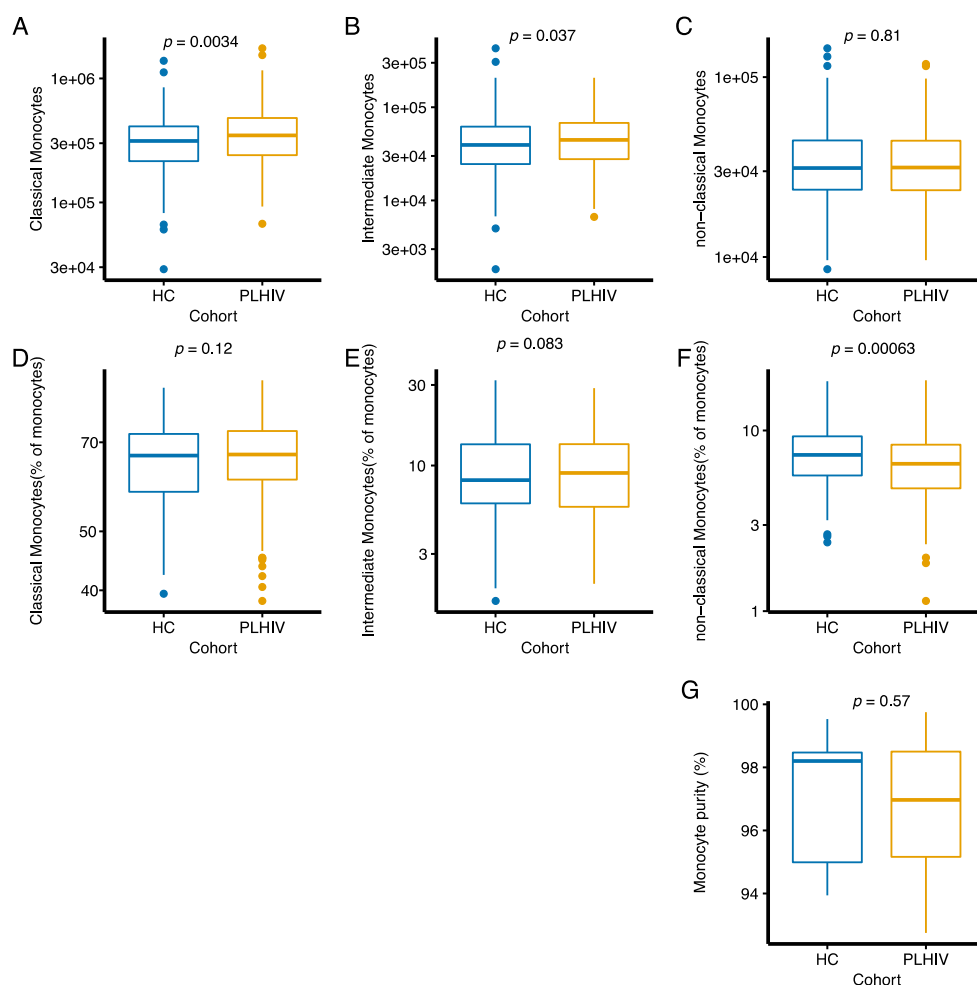

**Supplemental figure S4 Monocytes.** A-C Circulating monocyte subset concentrations determined by immunophenotyping. Classical monocytes(A): CD14++CD16-, Intermediate(B): CD14++CD16+, non-classical(C): CD14+CD16+. D-F subsets are depicted as % of total monocytes. G: Monocyte purity after CD14-negative selection magnetic bead isolation determined by Sysmex XN-450 hematology analyzer.

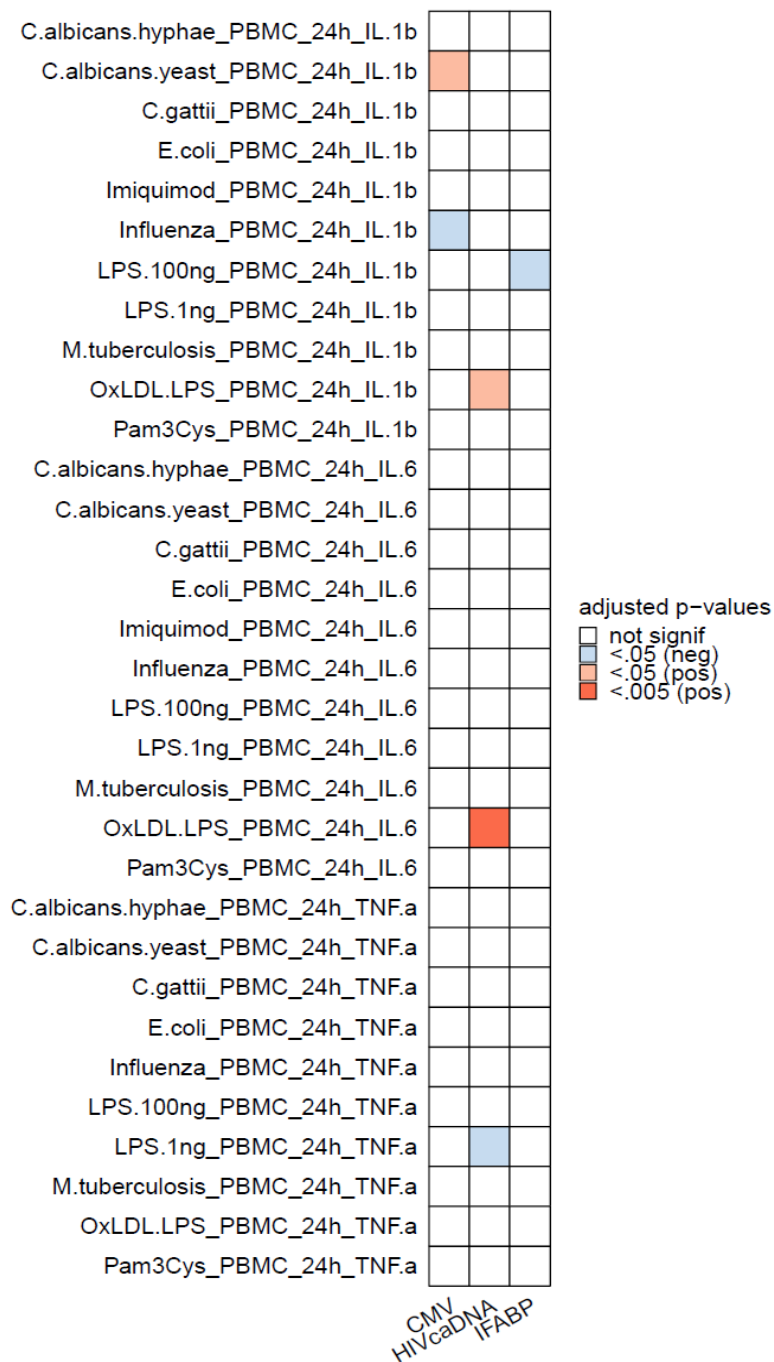

**Supplemental figure S5: HIV reservoir, CMV seropositivity and microbial integrity.** P-value are depicted from linear regression. Red depicts a significant positive correlation, blue depicts negative correlation. All p-values are FDR corrected.
